# Supplementary material
Source: publisher figshare collection journal article supplement (https://acs.figshare.com/ndownloader/files/8560651)
Supplement: Supplementary file 1 [file 8560651]

## Sheet: Sheet1
all	all	spliceosomal complex assembly 6.03 6.36E-05	spliceosomal complex assembly 6.03 6.36E-05	RNA splicing 5.79 2.17E-45	RNA splicing 5.79 2.17E-45	protein folding 5.47 1.47E-22	protein folding 5.47 1.47E-22	mRNA processing 5.43 3.42E-51	mRNA processing 5.43 3.42E-51	ncRNA processing 4.2 1.09E-21	ncRNA processing 4.2 1.09E-21	chromatin remodeling 3.1 5.78E-03	chromatin remodeling 3.1 5.78E-03	ribosome biogenesis 5.63 5.37E-31	ribosome biogenesis 5.63 5.37E-31	oxidative phosphorylation 5.8 1.46E-09	oxidative phosphorylation 5.8 1.46E-09	nuclear transport 5.46 3.34E-10	nuclear transport 5.46 3.34E-10	cellular respiration 6.93 1.06E-22	cellular respiration 6.93 1.06E-22
Aaas	0.192264	Celf1	0.486272	Acin1	-0.0812107	Calr	0.0113209	Acin1	-0.0812107	Bop1	0.409625	Actb	-0.205452	Aatf	-0.0559776	Atp5j2	-0.488821	Aaas	0.192264	Aco2	-0.363222
Aatf	-0.0559776	Crnkl1	0.375143	Aqr	-0.29119	Canx	-0.356866	Aqr	-0.29119	Bysl	0.442801	Actl6a	-0.0225891	Bop1	0.409625	Cox17	0.487856	Cse1l	0.143861	Aldh5a1	-0.43328
Abcb10	-0.0475272	Isy1	0.0298187	Bcas2	0.0238304	Cct2	0.181077	Bcas2	0.0238304	Cdkal1	-0.159895	Baz2a	0.398974	Bysl	0.442801	Cox5a	0.302144	Fubp3	-0.246564	Bax	0.268878
Abcb6	-0.767234	Luc7l	-0.060376	C1qbp	-0.202079	Cct3	0.287327	C1qbp	-0.202079	Cirh1a	-0.0178298	Bptf	0.192977	C1qbp	-0.202079	Cox6a1	0.702664	Hnrnpk	0.0581615	Cmc1	-3.39927
Abcc4	-0.512797	Luc7l2	-0.471924	Cd2bp2	-0.368433	Cct5	0.290881	Ccrn4l	0.208131	Dcaf13	0.038351	Chd1	0.158406	Cirh1a	-0.0178298	Cox6b1	0.624095	Igf2bp2	-0.215662	Coq9	-0.414689
Abcd3	0.102233	Luc7l3	0.0738282	Cdc40	0.162657	Cct6a	0.253381	Cd2bp2	-0.368433	Ddx1	0.0352316	Chd4	0.119116	Dcaf13	0.038351	Cox7a1	-0.361016	Ipo5	0.538443	Cox5a	0.302144
Abhd11	-0.557192	Prpf19	0.245779	Cdc5l	-0.145408	Cct7	0.512879	Cdc40	0.162657	Ddx21	1.20549	Gatad2b	0.00860196	Ddx21	1.20549	Cox7a2	0.423284	Khsrp	0.0846689	Cs	0.0726369
Abhd12	0.723121	Psip1	0.128202	Cdk12	0.145219	Cct8	-0.599311	Cdc5l	-0.145408	Ddx47	-0.183614	Hdac1	0.19321	Ddx3x	0.0341135	Cycs	0.363587	Kpna1	-0.234714	Cycs	0.363587
Ablim1	-1.31628	Rbm5	-0.209232	Celf1	0.486272	Cdc37	0.00754283	Cdc73	1.01396	Ddx51	0.0631557	Hmg20a	0.0864704	Ddx47	-0.183614	Gfer	0.552245	Kpnb1	0.107928	Dlat	-0.495552
Acaa1a	0.0985819	Sf3a1	0.0540877	Crnkl1	0.375143	Chchd4	-0.0307652	Cdk12	0.145219	Ddx56	0.628701	Hmgb1	0.682059	Ddx51	0.0631557	mt-Co3	0.0704017	Noc2l	0.196892	Dld	-0.218141
Acaa2	0.0511159	Sf3a2	0.378849	Cwc15	0.120066	Clpx	-0.157501	Celf1	0.486272	Dkc1	0.603988	Hnrnpc	0.161388	Ddx56	0.628701	Ndufa2	0.0518568	Nol6	0.0458049	Dlst	0.0290977
Acadl	-0.0735048	Snrpd1	0.638045	Cwc22	0.0416158	Clu	0.0257741	Cpsf1	-0.45563	Ebna1bp2	-0.159368	Mbd3	-0.144351	Dkc1	0.603988	Ndufa5	0.275044	Nup107	-0.159251	Fxn	0.254349
Acadm	-0.147138	Snrpd3	0.829042	Ddx1	0.0352316	Dnaja1	-0.11348	Cpsf2	0.0774324	Emg1	0.557037	Rbbp4	0.130183	Ebna1bp2	-0.159368	Ndufa6	0.522335	Nup153	-0.0369329	Idh1	0.297836
Acadsb	0.174495	Srsf1	-0.0287116	Ddx23	0.294582	Dnaja2	-0.313262	Cpsf4	0.212007	Exosc4	0.30415	Rbbp7	0.174976	Eif6	0.209173	Ndufa8	0.297327	Nup160	0.139864	Idh3a	-0.202908
Acadvl	-0.339988	Srsf10	0.199451	Ddx46	-0.0244658	Dnaja3	-0.230458	Cpsf6	-0.275819	Exosc5	-0.00808411	Rsf1	0.493455	Emg1	0.557037	Ndufb5	-0.0977505	Nup214	-0.243317	Idh3b	0.10881
Acat1	-0.720533	Srsf6	0.0681085	Ddx47	-0.183614	Dnajb11	-0.00791039	Crnkl1	0.375143	Exosc6	0.134005	Ruvbl2	0.271965	Exosc4	0.30415	Ndufc2	-0.0884408	Nup50	-0.127057	Idh3g	-0.0681954
Acbd3	-0.266376	Ythdc1	0.847471	Ddx5	0.142621	Dnajb6	-0.688571	Cstf1	0.030107	Exosc8	-0.167055	Smarca4	0.263889	Exosc5	-0.00808411	Ndufs2	0.326967	Nup54	-0.305666	Mdh1	-0.00974694
Acbd4	-0.293958			Dhx15	0.266681	Ero1l	-0.6139	Cstf2	-0.176598	Exosc9	0.116525	Smarca5	0.735171	Exosc6	0.134005	Ndufs6	0.1408	Nup62	-0.874155	Mdh2	0.0763218
Acin1	-0.0812107			Dhx38	0.14435	Ero1lb	-0.564782	Cstf3	-0.456749	Fbl	0.748897	Smarcc1	-0.0299228	Exosc8	-0.167055	Ndufs8	0.171496	Nup88	-0.433585	mt-Co3	0.0704017
Aco2	-0.363222			Eftud2	0.141844	Erp29	-0.169356	Cwc15	0.120066	Ftsj3	0.805421	Smarcc2	0.351112	Exosc9	0.116525	Ndufv1	0.14114	Nup93	-0.0633909	Mybbp1a	1.09128
Acot13	-0.103761			Eif4a3	0.770643	Erp44	-0.161328	Cwc22	0.0416158	Gar1	1.06982	Smarcd2	0.166379	Fbl	0.748897	Sdha	-0.134582	Nup98	-0.188761	Ndufa10	0.480178
Acot2	-0.789222			Hnrnpa1	-0.00126943	Fkbp11	-0.954216	Ddx1	0.0352316	Gtpbp3	-0.128003	Smarce1	-0.439936	Ftsj3	0.805421	Sdhb	-0.424066	Pcbp1	0.205786	Ndufa5	0.275044
Acot8	-0.0124397			Hnrnpa3	-0.0184483	Fkbp2	-0.138534	Ddx46	-0.0244658	Heatr1	0.0643224	Ssrp1	0.165452	Gar1	1.06982	Uqcr10	0.0383302	Pcbp2	0.336625	Ndufa7	0.226585
Acot9	-0.334596			Hnrnpc	0.161388	Fkbp4	0.557374	Ddx47	-0.183614	Hsd17b10	0.230883	Tfam	-0.157774	Gnl3	-0.108783	Uqcrb	-0.1098	Polr2d	-0.367256	Ndufaf2	0.544109
Acp6	-0.213272			Hnrnpf	0.00802907	Fkbp8	0.0295468	Ddx5	0.142621	Imp3	0.121816	Tnrc18	0.731475	Gtpbp4	0.355674	Uqcrh	0.239832	Ran	-0.105431	Ndufb8	0.376001
Acsf2	-0.292278			Hnrnph1	-0.0593002	Fkbp9	-0.146354	Dhx15	0.266681	Imp4	0.421402	Tox4	0.0851459	Heatr1	0.0643224			Rps28	-0.506625	Ndufc2	-0.0884408
Acsl1	-0.115654			Hnrnpk	0.0581615	Grpel1	-0.175269	Dhx38	0.14435	Ints1	0.120937			Imp3	0.121816			Rpsa	-0.911327	Ndufs4	-0.423693
Acsl5	0.544715			Hnrnpm	0.0822448	Grpel2	-1.08247	Eftud2	0.141844	Ints10	-0.229751			Imp4	0.421402			Tnpo1	-0.778281	Ndufs6	0.1408
Actb	-0.205452			Hnrnpu	0.323472	Hsp90aa1	0.277747	Fip1l1	-0.1565	Ints12	-0.789408			Krr1	0.538643					Ndufv2	-0.193925
Actc1	-0.0378254			Hspa8	0.0655735	Hsp90b1	-0.0271423	Hnrnpa1	-0.00126943	Ints3	0.121393			Lsg1	0.775918					Ogdh	-0.142243
Actl6a	-0.0225891			Isy1	0.0298187	Hspa8	0.0655735	Hnrnpa3	-0.0184483	Ints9	0.384287			Mphosph10	0.0564206					Oxa1l	-0.300139
Actn1	-1.42704			Iws1	0.341726	Hspa9	0.0222705	Hnrnpc	0.161388	Krr1	0.538643			Mphosph6	0.478938					Pdha1	-0.0671564
Actn4	-0.702495			Khsrp	0.0846689	Hspd1	0.00902532	Hnrnpf	0.00802907	Mphosph10	0.0564206			Mrm1	-0.0737913					Pdhb	-0.190262
Actr2	0.151463			Lgals3	0.772345	Hspe1	-0.0370731	Hnrnph1	-0.0593002	Mphosph6	0.478938			Mrpl10	-0.247206					Pmpcb	-0.142823
Actr3	0.0566564			Lsm2	0.0857936	Hsph1	0.544793	Hnrnpk	0.0581615	Mrm1	-0.0737913			Mrto4	0.278508					Sco2	-0.0801143
Adnp	-0.0182354			Luc7l	-0.060376	Mesdc2	-0.705956	Hnrnpl	0.48724	Mto1	0.0137009			Ngdn	-0.319606					Sdha	-0.134582
Adpgk	-0.226207			Luc7l2	-0.471924	P4hb	-0.16565	Hnrnpm	0.0822448	Ngdn	-0.319606			Nhp2	0.32168					Sdhaf2	0.190496
Adrm1	0.368494			Luc7l3	0.0738282	Pdia3	-0.00932274	Hnrnpu	0.323472	Nhp2	0.32168			Nip7	1.41773					Sdhb	-0.424066
Adss	0.464294			Ncbp1	0.341772	Pdia4	-0.310436	Hspa8	0.0655735	Nol11	0.132649			Noc4l	0.7351					Sdhc	-0.105173
Afg3l1	0.598869			Nono	0.440313	Pdia6	0.0818994	Isy1	0.0298187	Nol6	0.0458049			Nol11	0.132649					Sdhd	-0.226841
Afg3l2	-0.40467			Pabpc1	0.0384971	Ppia	0.154897	Iws1	0.341726	Nol8	-0.103657			Nol6	0.0458049					Slc25a12	-0.145266
Agk	0.667894			Phf5a	0.213261	Ppib	0.132528	Khsrp	0.0846689	Nop2	0.808583			Nol8	-0.103657					Slc25a13	0.00235049
Agpat5	-0.15852			Plrg1	0.0477011	Ppid	-0.730903	Lgals3	0.772345	Nop56	1.04058			Nop16	0.423431					Sod2	-0.302913
Agps	0.260914			Pnn	0.0293831	Ppie	-0.261054	Lsm2	0.0857936	Nop58	0.616432			Nop2	0.808583					Sucla2	-0.249297
Ahctf1	0.772865			Ppie	-0.261054	Ppif	-0.106946	Luc7l	-0.060376	Npm3	0.438225			Nop56	1.04058					Suclg1	-0.134424
Ahcy	0.683109			Ppil3	-0.562306	Ppig	-0.0649158	Luc7l2	-0.471924	Nsun2	0.0141646			Nop58	0.616432					Suclg2	-0.143299
Ahcyl2	0.191695			Prpf19	0.245779	Ppil3	-0.562306	Luc7l3	0.0738282	Pa2g4	-0.679284			Npm1	0.119178					Tbrg4	-0.294884
Ahdc1	-1.04743			Prpf3	0.299071	Prdx4	-0.404087	Mtpap	-0.0380784	Pdcd11	0.509018			Npm3	0.438225					Uqcr10	0.0383302
Ahnak	0.590338			Prpf31	0.223339	Ptges3	-2.13551	Ncbp1	0.341772	Pes1	1.32449			Pa2g4	-0.679284					Uqcrb	-0.1098
Ahnak2	-0.0993307			Prpf4	0.0771405	Qsox2	-0.162813	Nono	0.440313	Pusl1	-0.116791			Pdcd11	0.509018					Uqcrc1	0.163369
Ahsg	-0.628351			Prpf40a	-0.0432864	Ranbp2	-0.119938	Nudt21	0.380136	Pwp2	0.317826			Pes1	1.32449					Uqcrc2	0.554814
Aim1	-0.279662			Prpf6	-0.0624471	St13	0.0204461	Pabpc1	0.0384971	Rcl1	0.34415			Pwp2	0.317826					Uqcrh	0.239832
Aimp1	-0.31868			Prpf8	0.348407	Tcp1	0.10791	Pabpn1	0.00230738	Rnmtl1	-0.507184			Ran	-0.105431
Ak2	-0.107494			Psip1	0.128202	Tmx3	0.423593	Paf1	0.0708231	Rpl26	0.270864			Rcl1	0.34415
Ak3	-0.857845			Ptbp1	0.599846	Tmx4	0.0544397	Pcbp1	0.205786	Rpl5	0.418824			Rnmtl1	-0.507184
Akap1	0.153577			Puf60	-0.135086	Tor1a	-0.0580166	Pdcd11	0.509018	Rpp30	0.289223			Rpl26	0.270864
Akap8	0.000530809			Rbm17	-0.15213	Tor1b	-0.050384	Phf5a	0.213261	Rps28	-0.506625			Rpl5	0.418824
Akap8l	-0.348478			Rbm25	0.182772	Tor2a	0.290349	Plrg1	0.0477011	Rps7	-0.149414			Rplp0	0.0860635
Akr1b8	0.609478			Rbm39	0.0112551	Trap1	0.179706	Pnn	0.0293831	Rpsa	-0.911327			Rps14	0.0312526
Alas1	-0.833842			Rbm5	-0.209232	Txn2	0.351951	Pnpt1	0.248127	Rrp1	0.431296			Rps2	-0.121964
Alb	0.0361578			Rnps1	0.505988	Txndc5	-0.385511	Polr2d	-0.367256	Rrp1b	0.328203			Rps25	-0.368987
Aldh2	-0.12328			Sart1	-0.0893251	Txnl1	-0.386328	Ppie	-0.261054	Rrp8	-0.222468			Rps28	-0.506625
Aldh3a2	-0.572024			Scaf1	-0.474002	Vbp1	0.777225	Ppil3	-0.562306	Rrp9	0.531615			Rps7	-0.149414
Aldh5a1	-0.43328			Sf1	-0.0287466			Prpf19	0.245779	Sart1	-0.0893251			Rpsa	-0.911327
Aldh7a1	0.0442419			Sf3a1	0.0540877			Prpf3	0.299071	Skiv2l2	0.471879			Rrp1	0.431296
Aldh9a1	-0.494709			Sf3a2	0.378849			Prpf31	0.223339	Srrt	-0.144089			Rrp1b	0.328203
Aldoa	0.0759838			Sf3a3	0.396385			Prpf4	0.0771405	Ssb	0.300201			Rrp8	-0.222468
Alg2	0.215046			Sf3b1	0.0177988			Prpf40a	-0.0432864	Tbl3	0.0252671			Rrp9	0.531615
Alg5	0.749445			Sf3b3	-0.0506116			Prpf6	-0.0624471	Trnt1	-0.0922599			Rrs1	0.448845
Alkbh7	-0.0584207			Sf3b5	0.255138			Prpf8	0.348407	Utp14a	-0.142899			Sart1	-0.0893251
Anln	-0.693847			Sfpq	0.189159			Psip1	0.128202	Utp15	-0.0292137			Skiv2l2	0.471879
Ano10	-0.135603			Skiv2l2	0.471879			Ptbp1	0.599846	Utp18	0.0944902			Tbl3	0.0252671
Ano6	-0.329773			Snrnp200	-0.152963			Puf60	-0.135086	Utp20	0.64909			Utp14a	-0.142899
Anxa1	0.420149			Snrnp40	0.175495			Rbm17	-0.15213	Utp3	0.0538624			Utp15	-0.0292137
Anxa11	1.43556			Snrnp70	0.0841372			Rbm25	0.182772	Utp6	-0.0418121			Utp18	0.0944902
Anxa2	1.22009			Snrpa1	-0.0123551			Rbm27	-0.0663045	Wbp11	0.102094			Utp20	0.64909
Anxa4	1.33007			Snrpb2	0.170335			Rbm39	0.0112551	Wdr12	0.018276			Utp3	0.0538624
Anxa5	0.452726			Snrpc	0.790277			Rbm5	-0.209232	Wdr3	0.56818			Utp6	-0.0418121
Ap2a1	-0.0550876			Snrpd1	0.638045			Rnps1	0.505988	Wdr36	0.421058			Wbp11	0.102094
Ap2b1	0.000318872			Snrpd2	0.626775			Sart1	-0.0893251					Wdr12	0.018276
Apbb2	-0.379748			Snrpd3	0.829042			Scaf1	-0.474002					Wdr3	0.56818
Aplp2	0.16554			Snrpe	1.59899			Sf1	-0.0287466					Wdr36	0.421058
Apoe	0.413146			Snrpn	0.327868			Sf3a1	0.0540877
Apoh	0.665819			Snw1	-0.13008			Sf3a2	0.378849
Apoo	-0.0604625			Son	0.0970683			Sf3a3	0.396385
Apool	-0.421979			Srrm1	-0.957503			Sf3b1	0.0177988
Aprt	0.116356			Srrm2	-0.255628			Sf3b3	-0.0506116
Aqr	-0.29119			Srsf1	-0.0287116			Sf3b5	0.255138
Arf2	0.320842			Srsf10	0.199451			Sfpq	0.189159
Arfrp1	-0.764748			Srsf12	0.289977			Skiv2l2	0.471879
Arg1	2.01844			Srsf2	0.623863			Snrnp200	-0.152963
Arhgdia	0.395389			Srsf3	0.48917			Snrnp40	0.175495
Arl6ip6	-0.220457			Srsf5	-0.173408			Snrnp70	0.0841372
Armc1	-0.545164			Srsf6	0.0681085			Snrpa1	-0.0123551
Armc10	-0.714468			Srsf7	0.29435			Snrpb2	0.170335
Arpc1b	0.361432			Srsf9	-0.128761			Snrpc	0.790277
Arpc2	0.464336			Supt6h	0.281552			Snrpd1	0.638045
Arpc3	0.0028623			Syncrip	-0.2636			Snrpd2	0.626775
Arpc4	-0.375305			Tardbp	0.0510513			Snrpd3	0.829042
Arpc5	-0.120094			Tfip11	0.152938			Snrpe	1.59899
Arpc5l	-0.304911			Thoc2	-0.28959			Snrpn	0.327868
Asah1	0.726773			Thoc4	0.692255			Snw1	-0.13008
Asna1	-0.190993			Thoc6	1.06038			Son	0.0970683
Asph	-0.0764207			Thrap3	0.0674245			Srrm1	-0.957503
Atad1	-0.164661			Tra2a	0.203577			Srrm2	-0.255628
Atad2	0.58972			Tra2b	0.145377			Srsf1	-0.0287116
Atad2b	-0.0928118			U2af1	0.168467			Srsf10	0.199451
Atg9a	-0.331904			U2af2	0.0568559			Srsf12	0.289977
Atic	0.210395			Usp39	0.631117			Srsf2	0.623863
Atl2	0.038502			Wbp11	0.102094			Srsf3	0.48917
Atl3	0.00273384			Wtap	-0.654003			Srsf5	-0.173408
Atp11b	-0.330777			Xab2	0.0536224			Srsf6	0.0681085
Atp13a1	-0.0967281			Ythdc1	0.847471			Srsf7	0.29435
Atp13a3	0.237873			Zcchc8	-0.0833941			Srsf9	-0.128761
Atp1a1	-0.111783							Supt6h	0.281552
Atp1b1	-0.0286563							Sympk	-0.311626
Atp1b3	0.103239							Syncrip	-0.2636
Atp2a2	0.265331							Tardbp	0.0510513
Atp2b1	-0.294807							Tfip11	0.152938
Atp5a1	-0.155521							Thoc2	-0.28959
Atp5b	0.0101926							Thoc4	0.692255
Atp5c1	0.300306							Thoc6	1.06038
Atp5d	-0.585111							Thrap3	0.0674245
Atp5f1	0.20899							Tra2a	0.203577
Atp5h	-0.00632954							Tra2b	0.145377
Atp5j	-0.458223							U2af1	0.168467
Atp5j2	-0.488821							U2af2	0.0568559
Atp5l	0.00694629							Usp39	0.631117
Atp5o	0.456329							Wbp11	0.102094
Atp6ap1	0.0110869							Wdr33	-0.188581
Atp6v0d1	-0.359283							Wtap	-0.654003
Atp6v1a	-1.05662							Xab2	0.0536224
Atp6v1b2	-0.0858363							Xrn2	0.203687
AU018091	0.83222							Ythdc1	0.847471
Aup1	0.145558							Zcchc8	-0.0833941
Aurkb	-0.735456
Azi1	-0.321274
B3galtl	-1.24774
B3gnt2	-0.0428536
B4galt1	0.834695
B4galt7	-0.0554292
Baiap2	-0.503928
Baiap2l1	-0.312895
Bak1	0.0363323
Banf1	0.0361666
Basp1	-0.354831
Bax	0.268878
Baz2a	0.398974
Bcap31	0.617427
Bcas2	0.0238304
Bcat2	0.0126015
Bckdha	-1.07247
Bckdk	-0.64709
Bcl2l1	-0.225698
Bcl2l13	-0.149911
Bcl7c	-1.23067
Bclaf1	0.303442
Bmp8b	-0.117654
Bms1	0.804205
Bop1	0.409625
Bphl	-0.41217
Bptf	0.192977
Brca1	-1.14852
Brd4	-0.227718
Bri3bp	0.324962
Bsg	-0.326201
Bst2	0.217047
Bysl	0.442801
C1qbp	-0.202079
Cacna1d	-0.30734
Cad	-0.308485
Cald1	-1.84566
Calr	0.0113209
Calu	-0.294502
Camk2d	0.33949
Canx	-0.356866
Cap1	0.718799
Capza1	-0.0902464
Capza2	-0.513387
Capzb	-0.639889
Cast	-0.418067
Cav1	0.165634
Cav2	0.166577
Cbfb	-0.648637
Cbx1	-0.357579
Cbx3	0.112215
Cbx5	-0.116372
Ccar1	0.127828
Ccbl2	-0.540493
Ccdc12	0.0132789
Ccdc126	-0.201022
Ccdc127	0.324777
Ccdc47	0.503761
Ccdc51	0.216136
Ccdc58	0.333797
Ccdc86	-0.0138088
Ccrn4l	0.208131
Cct2	0.181077
Cct3	0.287327
Cct5	0.290881
Cct6a	0.253381
Cct7	0.512879
Cct8	-0.599311
Cd109	-1.03804
Cd151	-0.0383158
Cd2bp2	-0.368433
Cd63	0.742593
Cd9	0.473152
Cdc37	0.00754283
Cdc40	0.162657
Cdc42	-0.245393
Cdc5l	-0.145408
Cdc73	1.01396
Cdcp1	0.534726
Cdipt	0.238782
Cdk1	-0.256594
Cdk12	0.145219
Cdk5rap3	-0.0684237
Cdkal1	-0.159895
Cdkn2aip	-0.458581
Cds2	-0.0033584
Cebpz	0.408666
Celf1	0.486272
Cenpf	-0.420302
Cep55	0.248037
Cep72	-0.891514
Cept1	-0.33727
Cetn3	-0.890038
Chchd3	0.00257836
Chchd4	-0.0307652
Chchd6	-0.364808
Chd1	0.158406
Chd4	0.119116
Chmp4b	-0.573582
Chst13	0.104131
Cic	-1.03871
Cirh1a	-0.0178298
Cisd1	1.08477
Ckap2	0.68776
Ckap4	-0.194219
Ckb	0.974852
Cks2	-0.489611
Clcc1	-0.463642
Cldnd1	-0.0935984
Clic1	0.436863
Clk2	-0.00366119
Clpp	0.0487117
Clptm1	0.102787
Clptm1l	0.475716
Clpx	-0.157501
Clta	-0.274312
Cltb	-0.434452
Cltc	-0.180845
Clu	0.0257741
Clybl	-0.333973
Cmas	-0.222316
Cmc1	-3.39927
Cnih4	0.946944
Cnn3	-0.86147
Cnot1	-1.74136
Cnpy2	-0.0898751
Cnpy3	-0.455045
Cnpy4	-0.700087
Coil	-0.549653
Comtd1	-0.0214573
Coq3	-0.197812
Coq6	-0.33183
Coq9	-0.414689
Coro1c	-0.835325
Cox17	0.487856
Cox4i1	-0.113321
Cox5a	0.302144
Cox6a1	0.702664
Cox6b1	0.624095
Cox6c	0.200942
Cox7a1	-0.361016
Cox7a2	0.423284
Cpox	-0.0320467
Cpsf1	-0.45563
Cpsf2	0.0774324
Cpsf4	0.212007
Cpsf6	-0.275819
Cpt1a	0.00844078
Cpt2	-0.230718
Cr1l	-0.331491
Crat	-0.507936
Crnkl1	0.375143
Crot	-0.501172
Cs	0.0726369
Cse1l	0.143861
Csnk1a1	0.240117
Csnk1d	-0.103792
Csnk2a1	0.350013
Csnk2a2	-0.286577
Csnk2b	0.24237
Cst3	-0.530272
Cstf1	0.030107
Cstf2	-0.176598
Cstf3	-0.456749
Ctage5	-0.26483
Ctcf	1.50068
Ctdspl2	-0.0578722
Ctnnbl1	0.261414
Ctsb	0.465594
Ctsd	0.402651
Ctsl	1.05114
Ctsz	0.553271
Cttn	-0.0838799
Cwc15	0.120066
Cwc22	0.0416158
Cyb5	0.020572
Cyb5b	0.487108
Cyb5r1	0.245754
Cyb5r3	0.107095
Cyc1	0.221689
Cycs	0.363587
Cyp4f16	0.130146
Cytsa	-0.299867
D10Jhu81e	-0.00917717
D17Wsu104e	-0.659969
D2Wsu81e	-0.0397962
Daam1	0.314138
Dad1	-0.315713
Dag1	-0.438423
Dap3	0.348061
Dars	-0.393864
Dars2	-0.184261
Dazap1	-0.190537
Dbt	-0.11064
Dcaf13	0.038351
Dcaf7	-0.813222
Dcakd	-0.118659
Dctn4	0.274294
Ddb1	-0.427255
Ddost	-0.00866171
Ddr2	0.554961
Ddx1	0.0352316
Ddx10	0.813041
Ddx17	-0.0479674
Ddx18	1.53954
Ddx21	1.20549
Ddx23	0.294582
Ddx27	0.6644
Ddx3x	0.0341135
Ddx42	-0.17258
Ddx46	-0.0244658
Ddx47	-0.183614
Ddx5	0.142621
Ddx51	0.0631557
Ddx56	0.628701
Decr1	-0.274097
Degs1	0.510654
Dek	0.304446
Derl1	-0.116323
Dguok	0.474637
Dhodh	-0.258022
Dhrs1	0.336857
Dhrs13	0.22756
Dhrs7	-0.443598
Dhrs7b	0.281027
Dhx15	0.266681
Dhx38	0.14435
Dhx9	0.137879
Dido1	0.234805
Dkc1	0.603988
Dlat	-0.495552
Dld	-0.218141
Dlg1	-0.546513
Dlst	0.0290977
Dnaja1	-0.11348
Dnaja2	-0.313262
Dnaja3	-0.230458
Dnajb11	-0.00791039
Dnajb6	-0.688571
Dnajc13	-0.398499
Dnajc19	-0.357476
Dnajc9	-0.665674
Dnmt1	0.485236
Dnpep	0.153432
Dnttip1	-0.0312231
Dnttip2	0.0354092
Dpm1	-0.10761
Dpm3	-0.411386
Dpy30	0.469285
Dpysl2	0.174118
Dr1	0.367538
Dsp	-0.187245
Dstn	-0.537252
Dut	-0.776927
Dync1h1	-0.643431
Ebna1bp2	-0.159368
Ebp	-0.86322
Ech1	-0.565492
Echdc3	0.0424865
Echs1	-0.394147
Ecsit	-0.454466
Edc4	-0.619528
Eed	-0.376358
Eef1a1	0.782019
Eef1d	-0.270148
Eef1g	-0.0802729
Eef2	0.669112
Efemp1	-0.089474
Efhd2	-1.70626
Efr3a	0.397163
Eftud2	0.141844
Egfr	-0.221938
Ehd2	0.184921
Eif3b	0.1144
Eif3e	-0.116056
Eif3h	-0.269419
Eif3i	-0.421191
Eif4a1	0.384119
Eif4a3	0.770643
Eif4g1	0.269183
Eif5	0.435434
Eif5a	0.369301
Eif6	0.209173
Elf2	-0.796021
Elovl1	0.105039
Emd	-0.276964
Emg1	0.557037
Eno1	0.121025
Enpp4	0.0754248
Eny2	-0.362617
Epha2	0.350984
Epn3	0.583123
Eppk1	-0.165551
Eps8	0.266639
Erap1	-0.93149
Ergic1	-0.2517
Erlec1	-0.586744
Erlin1	0.165672
Erlin2	0.00373743
Ero1l	-0.6139
Ero1lb	-0.564782
Erp29	-0.169356
Erp44	-0.161328
Esf1	-0.275456
Esyt1	-0.045963
Esyt2	-0.106659
Etfa	-0.380657
Etfb	-0.472925
Etfdh	-0.380314
Ethe1	0.123788
Ewsr1	0.0679234
Exd2	-0.709716
Exosc4	0.30415
Exosc5	-0.00808411
Exosc6	0.134005
Exosc8	-0.167055
Exosc9	0.116525
Ezr	0.236556
Faf2	0.314252
Fam162a	-0.0851039
Fam83h	-0.406146
Far1	0.461523
Fasn	0.394977
Fbl	0.748897
Fdxr	-0.509934
Fech	-0.230991
Fetub	-0.678602
Fga	-1.80558
Fgb	-1.82168
Fgg	-1.72643
Fip1l1	-0.1565
Fis1	0.556272
Fkbp11	-0.954216
Fkbp2	-0.138534
Fkbp4	0.557374
Fkbp8	0.0295468
Fkbp9	-0.146354
Flii	-0.100257
Flnb	-0.543909
Flnc	-0.103289
Flot1	0.30493
Flot2	-0.118625
Fmr1	-0.625477
Fnbp4	-0.494188
Fndc3a	-0.386209
Fpgs	-0.178233
Fscn1	0.0139103
Ftl1	1.04287
Ftsj3	0.805421
Fubp3	-0.246564
Fundc2	-0.174712
Fus	0.249654
Fxn	0.254349
Fxr1	0.159261
Fxr2	-0.4248
G3bp1	-0.467144
Gaa	0.209495
Gab1	0.109205
Gadd45gip1	0.236676
Galnt7	0.122877
Ganab	0.0190788
Gar1	1.06982
Gars	0.150302
Gart	0.627942
Gatad2b	0.00860196
Gatm	0.362214
Gbf1	0.0843311
Gcat	-0.186059
Gde1	-0.116724
Gdi2	-0.0950328
Gfer	0.552245
Gfm1	-0.0738328
Gfm2	-0.251092
Ghitm	0.0141484
Gle1	-0.0479551
Glg1	0.214017
Glrx5	0.239279
Gls	0.462671
Glud1	-0.078041
Glyr1	0.51763
Gm15127	0.191816
Gm15128	0.138093
Gm5093	0.109474
Gna11	-0.0622285
Gna13	-0.176366
Gnai2	-0.179669
Gnai3	0.116705
Gnaq	-0.209421
Gnas	-0.0684154
Gnb1	0.04662
Gnb2	0.482478
Gnb2l1	-0.830121
Gng12	0.798962
Gnl3	-0.108783
Gnpat	-0.423935
Golga2	0.236389
Golga5	-0.266557
Golim4	-0.254099
Gorasp2	0.104671
Gosr1	0.20504
Gosr2	1.56741
Got1	-0.150364
Got2	0.25743
Gpatch4	-0.153018
Gpatch8	-0.237316
Gpnmb	0.313948
Gpr116	0.162101
Gprc5a	0.450642
Gpsm2	-0.139876
Gpx1	0.862192
Gramd4	0.18851
Grhpr	-0.565812
Gripap1	-2.78712
Grn	1.45222
Grpel1	-0.175269
Grpel2	-1.08247
Gsn	-0.19498
Gstp2	0.791678
Gtf2a1	-1.23895
Gtpbp3	-0.128003
Gtpbp4	0.355674
Guf1	0.0101407
Gys1	-0.974649
H13	0.32235
H2afv	0.246338
H2afx	0.177213
H2-K1	-0.504489
H2-L	0.582787
H3f3a	3.10145
Hadh	-0.0883683
Hadha	-0.206744
Hadhb	-0.163456
Hax1	-0.0355362
Hbb-b1	-0.689923
Hccs	0.324811
Hcfc1	-0.27665
Hdac1	0.19321
Hdhd2	0.126086
Heatr1	0.0643224
Hebp1	-0.374553
Hexa	-0.263159
Hibadh	-0.425817
Hibch	-0.35339
Higd1a	0.327302
Hint1	-0.234494
Hist1h1b	1.50526
Hist1h1e	1.60367
Hist1h2bp	0.297988
Hist2h2aa1	0.706963
Hist3h2a	0.756143
Hk2	0.124595
Hmg20a	0.0864704
Hmgb1	0.682059
Hmgcl	-0.0991442
Hmox2	0.0157166
Hnrnpa0	0.259688
Hnrnpa1	-0.00126943
Hnrnpa3	-0.0184483
Hnrnpab	0.267501
Hnrnpc	0.161388
Hnrnpd	0.692004
Hnrnpf	0.00802907
Hnrnph1	-0.0593002
Hnrnpk	0.0581615
Hnrnpl	0.48724
Hnrnpm	0.0822448
Hnrnpr	0.0270005
Hnrnpu	0.323472
Hnrnpul2	0.0751993
Hpcal1	-0.0838124
Hprt	0.424621
Hs2st1	0.0172281
Hsd17b10	0.230883
Hsd17b12	0.225833
Hsd17b4	-0.0555567
Hsd17b7	-1.11533
Hsd3b7	0.0923199
Hsdl1	-0.22854
Hsdl2	-0.715605
Hsp90aa1	0.277747
Hsp90b1	-0.0271423
Hspa1b	0.0549389
Hspa4	0.323431
Hspa5	-0.140783
Hspa8	0.0655735
Hspa9	0.0222705
Hspb1	0.299847
Hspd1	0.00902532
Hspe1	-0.0370731
Hspg2	-1.49876
Hsph1	0.544793
Htra2	-0.320911
Hyou1	0.00277603
Iap	0.345364
Iars	-0.222117
Iars2	-0.0827073
Ict1	0.0380596
Idh1	0.297836
Idh3a	-0.202908
Idh3b	0.10881
Idh3g	-0.0681954
Ifitm3	0.468172
Igf2bp2	-0.215662
Ighg1	1.41685
Il1rap	0.168835
Ilf2	-0.176243
Ilf3	0.180589
Ilvbl	0.138112
Immt	0.286529
Imp3	0.121816
Imp4	0.421402
Impad1	0.519456
Impdh2	-0.633635
Incenp	-0.0644537
Inf2	-0.224066
Insr	-0.201842
Ints1	0.120937
Ints10	-0.229751
Ints12	-0.789408
Ints3	0.121393
Ints9	0.384287
Ipo5	0.538443
Iqgap1	0.183286
Iscu	0.3883
Isoc2a	0.380089
Isy1	0.0298187
Isyna1	0.119697
Itga3	0.061102
Itga5	-0.174723
Itgam	0.833801
Itgb1	0.197221
Itgb2	0.914135
Itpa	0.740606
Itpr3	-0.313806
Ivd	-0.220813
Iws1	0.341726
Jak1	0.299195
Jund	-0.649373
Kank2	-0.576475
Kars	-0.184499
Kctd10	0.336127
Kdelr2	2.0592
Khdrbs1	0.0522177
Khsrp	0.0846689
Kidins220	0.045021
Kif16b	0.176631
Kif20a	-0.190001
Kif20b	0.096518
Kif22	-0.206062
Kif23	0.0716932
Kirrel	-0.415863
Kpna1	-0.234714
Kpna3	-0.340327
Kpna4	-1.3665
Kpnb1	0.107928
Kras	0.107617
Kri1	0.12203
Krr1	0.538643
Krt19	-0.477199
Krt8	-0.568368
Ktn1	0.169756
L2hgdh	-0.273206
Lactb	0.300629
Lactb2	0.185878
Lamb1	0.247942
Lamc1	0.287224
Lamp1	0.185698
Lap3	-0.345063
Larp4	-0.495192
Larp7	-0.031098
Lars	-0.304506
Lbr	-0.204194
Lclat1	-0.205987
Lcp1	-1.36824
Ldha	0.0484351
Ldlr	-0.211557
Lemd2	-0.124903
Letm1	-0.0433651
Lgals1	0.221178
Lgals3	0.772345
Lgals7	0.917278
Lig1	0.158267
Lig3	-1.16725
Lima1	-0.250791
Lman1	-0.223828
Lmf2	0.277636
Lmna	0.0116307
Lmnb1	-0.051457
Lmnb2	-0.253111
Lmo7	-0.638202
Lnp	-0.31557
Lnpep	-0.289674
Lonp1	0.132339
Lonp2	0.0929089
Lpcat1	-0.103744
Lpcat3	-0.0447809
Lpgat1	0.0250539
Lrpprc	0.13411
Lrrc32	-0.167524
Lrrc59	0.593863
Lsg1	0.775918
Lsm2	0.0857936
Luc7l	-0.060376
Luc7l2	-0.471924
Luc7l3	0.0738282
Ly6a	0.0656135
Ly6c2	-0.118624
Ly6e	1.78499
Lyrm4	-0.150512
M6pr	-0.0842973
Macf1	-0.0510509
Mad1l1	-0.391852
Maff	0.0265809
Mak16	0.618806
Manf	-0.0996394
Marcksl1	-0.396634
Mars	0.102941
Mars2	-0.357811
Matr3	0.194127
Mavs	-0.15498
Mbd3	-0.144351
Mcat	-0.479426
Mcfd2	-0.508751
Mcm2	0.246549
Mcm4	0.396067
Mcm6	-0.200174
Mcm7	0.137027
Mdc1	0.838671
Mdh1	-0.00974694
Mdh2	0.0763218
Mdn1	-0.274438
Me2	0.412135
Meaf6	-0.332183
Mecr	-0.891616
Med10	-0.462556
Med21	-0.430338
Mesdc2	-0.705956
Met	0.395673
Metap2	0.236218
Mff	-0.342684
Mfge8	0.55518
Mfn1	-0.519884
Mfn2	-0.405864
Mfsd10	-0.105419
Mgat1	0.517234
Mia3	-0.0902355
Mis12	-0.618405
Mmgt1	0.230077
Mogs	0.110145
Mpdu1	0.177116
Mphosph10	0.0564206
Mphosph6	0.478938
Mprip	-0.411682
Mpst	0.26487
Mrm1	-0.0737913
Mrpl1	0.455808
Mrpl10	-0.247206
Mrpl11	-0.269597
Mrpl12	-0.0827854
Mrpl13	-0.189712
Mrpl15	-0.0318589
Mrpl16	0.628431
Mrpl18	-0.301621
Mrpl19	0.459184
Mrpl21	0.497221
Mrpl22	0.481167
Mrpl23	0.0216161
Mrpl24	0.115441
Mrpl28	0.0294146
Mrpl3	0.131909
Mrpl35	0.417264
Mrpl37	-0.0581414
Mrpl38	0.372865
Mrpl4	0.010689
Mrpl40	0.0450737
Mrpl41	0.299649
Mrpl46	0.682671
Mrpl48	-0.0218501
Mrpl49	-0.215884
Mrpl50	0.0536546
Mrpl53	0.231802
Mrpl55	0.561277
Mrps14	-0.32367
Mrps16	0.695737
Mrps17	-0.0116526
Mrps21	0.0258209
Mrps22	0.00361076
Mrps23	-0.285272
Mrps27	-0.0719566
Mrps28	-0.160695
Mrps30	-0.00260301
Mrps31	0.0170935
Mrps35	0.243505
Mrps36	0.223669
Mrps5	0.340091
Mrps6	0.249732
Mrps7	0.0650487
Mrs2	-0.148738
Mrto4	0.278508
Msl1	-0.0772146
Msln	0.161333
Msn	0.460176
Mtch2	0.29243
mt-Co3	0.0704017
Mtdh	0.0657573
Mthfd2	0.579709
Mto1	0.0137009
Mtpap	-0.0380784
Mtpn	-1.54808
Mtx1	0.0345021
Mut	-0.375971
Mvp	0.1482
Myadm	0.359845
Mybbp1a	1.09128
Myef2	-0.17308
Myh14	-0.490825
Myh9	-0.0361121
Myl12b	-0.0500198
Myl3	-0.00848972
Myo10	-0.7023
Myo18a	-0.785163
Myo1b	-0.332272
Myo1c	0.462734
Myo1g	-0.287743
Myo5a	0.881863
Naa38	0.233138
Naa40	-0.184535
Naga	-0.669103
Nap1l1	0.464538
Napa	0.598314
Napg	-0.188093
Nat10	0.797692
Ncbp1	0.341772
Nceh1	-0.315052
Ncl	0.152845
Ncln	0.28607
Ncoa5	0.131578
Ncstn	0.533103
Ndel1	-0.539055
Ndrg1	-0.0724852
Ndst1	-0.0358555
Ndufa10	0.480178
Ndufa11	0.628459
Ndufa12	0.592189
Ndufa13	0.222736
Ndufa2	0.0518568
Ndufa4	0.266714
Ndufa5	0.275044
Ndufa6	0.522335
Ndufa7	0.226585
Ndufa8	0.297327
Ndufab1	0.311588
Ndufaf1	-0.1228
Ndufaf2	0.544109
Ndufb10	0.25114
Ndufb11	-0.228855
Ndufb5	-0.0977505
Ndufb6	-0.167966
Ndufb8	0.376001
Ndufc2	-0.0884408
Ndufs2	0.326967
Ndufs3	-0.0940797
Ndufs4	-0.423693
Ndufs6	0.1408
Ndufs8	0.171496
Ndufv1	0.14114
Ndufv2	-0.193925
Nenf	-1.09416
Nfic	-0.0817433
Nfu1	-0.330999
Nfyc	0.0771319
Ngdn	-0.319606
Ngfr	0.403047
Nhp2	0.32168
Nid1	-0.768634
Nip7	1.41773
Nipbl	0.134146
Nipsnap1	-0.0309738
Nit2	0.503603
Nln	0.133308
Nme1	0.446512
Nme2	0.329542
Nme3	0.371534
Nmnat1	0.73813
Noc2l	0.196892
Noc3l	1.05161
Noc4l	0.7351
Nol11	0.132649
Nol6	0.0458049
Nol7	-0.582523
Nol8	-0.103657
Nolc1	0.0667023
Nomo1	-0.0978926
Nono	0.440313
Nop16	0.423431
Nop2	0.808583
Nop56	1.04058
Nop58	0.616432
Npc2	0.999154
Npm1	0.119178
Npm3	0.438225
Nptn	0.255322
Nradd	0.311033
Nrf1	-0.463305
Nrm	-0.194297
Nsdhl	-1.1659
Nsf	0.0533633
Nsun2	0.0141646
Nt5dc2	-0.538214
Nucb1	-0.240882
Nucb2	-0.315392
Nucks1	-0.663831
Nudt21	0.380136
Numa1	-0.122894
Nup107	-0.159251
Nup133	0.0427538
Nup153	-0.0369329
Nup155	-0.0952839
Nup160	0.139864
Nup188	0.270254
Nup205	0.0542812
Nup214	-0.243317
Nup35	-0.0199578
Nup43	-0.137939
Nup50	-0.127057
Nup54	-0.305666
Nup62	-0.874155
Nup85	-0.188801
Nup88	-0.433585
Nup93	-0.0633909
Nup98	-0.188761
Nupl1	0.239466
Nvl	0.09597
Nxf1	0.460818
Oat	0.125249
Ociad1	0.292171
Ogdh	-0.142243
Ola1	0.286874
Opa1	-0.533976
Osbpl8	-0.0353261
Ostc	0.324144
Otub1	-0.0929085
Oxa1l	-0.300139
Oxct1	-0.347799
Oxnad1	0.217293
P4ha1	0.0876553
P4ha2	-0.0169977
P4hb	-0.16565
Pa2g4	-0.679284
Pabpc1	0.0384971
Pabpn1	0.00230738
Paf1	0.0708231
Pak1ip1	1.8296
Park7	0.456797
Parn	0.402734
Parp1	-0.145154
Pbrm1	0.188906
Pcbp1	0.205786
Pcbp2	0.336625
Pcca	-0.0291017
Pck2	0.0568108
Pcm1	-0.801566
Pcnt	-0.688219
Pcolce	0.0576336
Pcyox1	0.443678
Pcyt1a	-0.0866149
Pdcd11	0.509018
Pdcd5	-0.79146
Pdcd6	0.363623
Pdf	-0.00333772
Pdha1	-0.0671564
Pdhb	-0.190262
Pdhx	-0.1085
Pdia3	-0.00932274
Pdia4	-0.310436
Pdia6	0.0818994
Pdlim1	0.391264
Pdlim2	-2.1011
Pds5b	0.308604
Pebp1	-0.189523
Pelp1	-0.0528598
Pes1	1.32449
Pex14	0.0428105
Pfkp	-0.313362
Pfn1	0.518373
Pgam1	0.367943
Pgap1	-0.0159431
Pgd	0.0876334
Pgk1	0.217558
Pgrmc1	-0.203954
Pgrmc2	-0.0022421
Pgs1	0.468421
Phb	-0.0884837
Phb2	0.575205
Phf14	-0.294148
Phf5a	0.213261
Phgdh	0.0330111
Phip	0.44991
Pi4k2b	0.517046
Pign	-0.569066
Pigs	0.466578
Pik3c2g	-2.71252
Pitrm1	0.354519
Pkp4	0.226509
Plau	0.823867
Plec	0.317345
Plg	-2.28263
Plin2	-0.654334
Plin3	0.654508
Plod1	0.119633
Plod3	0.319505
Plp2	-0.0775845
Plrg1	0.0477011
Plxna1	-0.423719
Plxnb2	0.571075
Pmf1	-0.762964
Pml	0.315024
Pmpca	0.160128
Pmpcb	-0.142823
Pnn	0.0293831
Pno1	0.500883
Pnp	-2.6148
Pnpla6	0.458592
Pnpt1	0.248127
Podxl	0.48005
Pofut2	-0.240217
Poldip2	0.210692
Poldip3	0.18174
Polr1a	0.105107
Polr1b	0.0966767
Polr1e	0.297103
Polr2a	0.0158875
Polr2b	0.0493301
Polr2d	-0.367256
Polr2e	-0.110768
Polr2g	0.32811
Pon3	-0.288829
Por	0.347992
Ppa1	0.275328
Ppa2	-0.289762
Ppia	0.154897
Ppib	0.132528
Ppid	-0.730903
Ppie	-0.261054
Ppif	-0.106946
Ppig	-0.0649158
Ppil3	-0.562306
Ppp1ca	-0.00294026
Ppp1cb	0.319332
Ppp1cc	-0.371468
Ppp1r10	0.578387
Ppp1r12a	-0.552457
Ppp1r13l	-0.231047
Ppp1r9b	-0.83738
Ppp2r1a	-0.129546
Ppp2r2d	0.319124
Prdx1	0.20872
Prdx2	0.0350124
Prdx3	-0.208983
Prdx4	-0.404087
Prdx5	-0.683868
Prdx6	-0.101226
Preb	-0.274776
Prep	0.0790422
Prkar1a	0.0229402
Prkar2a	-0.353352
Prkcdbp	0.0600815
Prkcsh	-0.193146
Procr	1.2887
Prodh	0.288208
Prpf19	0.245779
Prpf3	0.299071
Prpf31	0.223339
Prpf4	0.0771405
Prpf40a	-0.0432864
Prpf6	-0.0624471
Prpf8	0.348407
Prph	-0.508754
Prr12	-0.0427407
Psap	-0.0181366
Psen1	-0.547455
Psip1	0.128202
Psma1	-0.00712175
Psma4	0.417808
Psma5	0.285058
Psma6	-0.105901
Psmb1	0.328816
Psmb2	0.431772
Psmb4	0.142234
Psmc3	-0.141552
Psmc4	0.335786
Psmc5	-0.0164288
Psmc6	0.0622237
Psmd12	0.128309
Psmd13	1.16206
Psmd14	1.09173
Psmd2	0.251499
Psmd5	-0.395757
Psmd6	-0.266707
Psme3	0.453898
Pspc1	-0.62512
Ptbp1	0.599846
Ptcd3	-0.173915
Ptges	-0.287174
Ptges3	-2.13551
Ptplad1	0.404926
Ptpmt1	0.564284
Ptrf	-0.0763911
Ptrh1	0.0549765
Ptrh2	0.0884711
Puf60	-0.135086
Purb	-0.768171
Pusl1	-0.116791
Pvr	-0.226324
Pwp2	0.317826
Pycr1	-0.699149
Pycr2	-0.324943
Qrich1	-1.44345
Qsox2	-0.162813
Rab10	-0.172902
Rab11b	-0.163732
Rab11fip1	0.538843
Rab14	0.420499
Rab18	0.167604
Rab1b	0.399078
Rab21	-0.184648
Rab2a	-0.159503
Rab35	0.492736
Rab3b	0.390115
Rab5a	0.111937
Rab5b	0.773081
Rab5c	0.230722
Rab8a	-0.00613247
Rac1	0.231137
Racgap1	0.000436074
Rad21	0.180434
Rad23b	0.216702
Rad50	0.0866558
Rae1	0.158638
Rai14	-0.363506
Rala	0.394124
Ralb	0.712881
Ran	-0.105431
Ranbp2	-0.119938
Rangap1	-0.568668
Rap2b	-0.20488
Rap2c	-0.0182105
Rars	-0.0931414
Rars2	-0.00804497
Rbbp4	0.130183
Rbbp5	0.466983
Rbbp6	-0.14642
Rbbp7	0.174976
Rbm10	-0.628707
Rbm14	-0.435782
Rbm15	-0.126302
Rbm17	-0.15213
Rbm19	0.451941
Rbm25	0.182772
Rbm27	-0.0663045
Rbm3	-0.017152
Rbm39	0.0112551
Rbm42	-0.0887546
Rbm5	-0.209232
Rbm8a	-0.0895145
Rcc1	0.297004
Rcl1	0.34415
Rcn2	-0.726395
Rdh11	0.0954161
Rdh13	0.755576
Rdx	-0.426869
Reep5	-0.375167
Reep6	-0.362849
Rfc2	-0.0516206
Rfc4	0.20873
Rhoa	0.488236
Rhog	0.300387
Rhot1	-0.137482
Rhot2	-0.325902
Rhox5	-0.149019
Rif1	0.402386
Rnf2	-0.0880891
Rnh1	0.75233
Rnmtl1	-0.507184
Rnps1	0.505988
Rpa3	0.00648649
Rpap2	-4.61778
Rpia	-0.654777
Rpl10l	-1.09284
Rpl12	0.0509697
Rpl13	0.306538
Rpl15	0.482675
Rpl18	0.00152381
Rpl22	0.482608
Rpl23	0.0749326
Rpl23a	-1.17924
Rpl26	0.270864
Rpl27a	-0.248756
Rpl3	0.558412
Rpl31	-0.22594
Rpl32	0.231085
Rpl35	1.22773
Rpl4	0.543578
Rpl5	0.418824
Rpl7l1	0.786201
Rpl9	-0.718608
Rplp0	0.0860635
Rplp1	0.3924
Rplp2	-0.425597
Rpn1	0.0116009
Rpp30	0.289223
Rprd1b	-0.229706
Rps10	1.17095
Rps14	0.0312526
Rps19bp1	-0.412897
Rps2	-0.121964
Rps25	-0.368987
Rps27l	0.814504
Rps28	-0.506625
Rps3	-0.377725
Rps4x	-0.21813
Rps5	0.117567
Rps7	-0.149414
Rpsa	-0.911327
Rragd	0.170066
Rrbp1	0.822805
Rrp1	0.431296
Rrp12	1.00006
Rrp1b	0.328203
Rrp8	-0.222468
Rrp9	0.531615
Rrs1	0.448845
Rsf1	0.493455
Rsl1d1	0.746117
Rtn3	0.194869
Rtn4	0.643243
Ruvbl1	-0.231006
Ruvbl2	0.271965
S100a10	0.390016
S100a11	1.01667
S100a6	-0.132302
Sacm1l	0.0628567
Safb	-0.17146
Samd1	-0.780031
Samm50	-0.221571
Sap30	-0.372204
Sap30bp	-0.491588
Sar1a	0.309769
Sars	0.302535
Sart1	-0.0893251
Scaf1	-0.474002
Scarb1	-0.509429
Scd2	-0.0611688
Scfd1	0.0035146
Sco1	0.454377
Sco2	-0.0801143
Scp2	0.254076
Scpep1	-0.0757162
Scrib	-0.651645
Sdc4	-0.403665
Sdf2l1	0.206087
Sdha	-0.134582
Sdhaf2	0.190496
Sdhb	-0.424066
Sdhc	-0.105173
Sdhd	-0.226841
Sdpr	0.665929
Sec11a	0.228506
Sec13	-0.227134
Sec22b	0.419121
Sec63	0.0975984
Seh1l	0.883152
Serbp1	-0.404562
Serpina1b	0.774759
Serpina3k	0.21287
Sf1	-0.0287466
Sf3a1	0.0540877
Sf3a2	0.378849
Sf3a3	0.396385
Sf3b1	0.0177988
Sf3b2	0.117176
Sf3b3	-0.0506116
Sf3b5	0.255138
Sfpq	0.189159
Sfxn1	-0.00710801
Sfxn3	-0.204529
Sgip1	-0.378026
Sgpl1	0.178798
Shmt2	0.322908
Sike1	-0.90931
Sin3a	-0.54859
Sipa1l3	-0.625996
Skiv2l2	0.471879
Slc12a2	-8.04194e-05
Slc12a4	-0.223513
Slc12a9	-0.734073
Slc16a1	-0.265616
Slc1a4	-0.624006
Slc1a5	-0.466497
Slc25a1	0.251013
Slc25a10	-0.222221
Slc25a11	0.097835
Slc25a12	-0.145266
Slc25a13	0.00235049
Slc25a17	0.0109905
Slc25a22	0.254714
Slc25a24	0.185418
Slc25a3	0.130306
Slc25a4	0.423246
Slc25a5	0.245942
Slc29a1	0.238839
Slc29a2	-0.295942
Slc2a1	-0.408774
Slc2a3	0.115699
Slc33a1	0.487223
Slc35c1	0.167438
Slc38a2	1.41234
Slc39a10	-0.13621
Slc39a14	-0.552757
Slc39a7	-0.33889
Slc3a2	-0.0806228
Slc44a1	-0.479015
Slc4a7	-0.361319
Slc7a1	0.290476
Slc9a3r1	0.148604
Slc9a3r2	-0.196115
Slmap	-0.610157
Sltm	0.218093
Smarca4	0.263889
Smarca5	0.735171
Smarcc1	-0.0299228
Smarcc2	0.351112
Smarcd2	0.166379
Smarce1	-0.439936
Smc3	0.108684
Smc5	0.508048
Smc6	0.244848
Smchd1	0.139797
Smpd4	-0.336878
Smpdl3b	0.0658508
Smu1	0.17013
Snap47	0.129393
Snd1	-0.686597
Snrnp200	-0.152963
Snrnp40	0.175495
Snrnp70	0.0841372
Snrpa1	-0.0123551
Snrpb2	0.170335
Snrpc	0.790277
Snrpd1	0.638045
Snrpd2	0.626775
Snrpd3	0.829042
Snrpe	1.59899
Snrpn	0.327868
Sntb2	-0.0112771
Snw1	-0.13008
Snx3	0.465946
Soat1	0.0751885
Sod1	-0.274329
Sod2	-0.302913
Son	0.0970683
Sorbs1	-1.66942
Sparc	0.459703
Spc24	-0.807081
Spcs2	0.199639
Spcs3	0.026776
Spg7	-0.338915
Spryd4	0.11595
Sptlc1	-0.0894612
Sptlc2	0.119252
Sqstm1	0.138406
Src	0.0896738
Srpr	0.523021
Srprb	0.338264
Srrm1	-0.957503
Srrm2	-0.255628
Srrt	-0.144089
Srsf1	-0.0287116
Srsf10	0.199451
Srsf11	-0.0167293
Srsf12	0.289977
Srsf2	0.623863
Srsf3	0.48917
Srsf5	-0.173408
Srsf6	0.0681085
Srsf7	0.29435
Srsf9	-0.128761
Ssb	0.300201
Ssbp1	0.424159
Ssfa2	-0.979661
Ssr1	0.197407
Ssr4	0.121166
Ssrp1	0.165452
St13	0.0204461
St3gal1	-0.0585868
Stim1	-0.783661
Stim2	-0.486737
Stip1	0.0113484
Stmn1	-0.52253
Stoml2	0.186731
Strn	-0.44444
Stt3a	-0.177809
Stt3b	-0.328314
Stx12	-0.167819
Stx17	0.459116
Stx7	-0.383345
Stx8	-0.339176
Stxbp1	0.325673
Styk1	0.111449
Sucla2	-0.249297
Suclg1	-0.134424
Suclg2	-0.143299
Sun1	0.0777608
Suox	0.193445
Supt5h	0.303827
Supt6h	0.281552
Surf4	0.343174
Suz12	0.225721
Svil	-0.0967475
Sympk	-0.311626
Syncrip	-0.2636
Syne1	-3.23182
Syne2	-0.222201
Syngr2	-0.422654
Taco1	0.500272
Taf6	-0.113379
Tagln2	0.069153
Tap2	0.108946
Tapbp	0.195727
Tardbp	0.0510513
Tbl1x	-0.336296
Tbl3	0.0252671
Tbrg4	-0.294884
Tcerg1	0.0430653
Tcirg1	-0.247326
Tcof1	-0.395622
Tcp1	0.10791
Terf2ip	-0.817834
Tes	0.394098
Tex10	0.17839
Tex264	0.125492
Tfam	-0.157774
Tfip11	0.152938
Tfrc	-0.58932
Thoc2	-0.28959
Thoc4	0.692255
Thoc6	1.06038
Thrap3	0.0674245
Tial1	0.0250059
Timm13	0.0926337
Timm17b	-0.420499
Timm22	0.0169712
Timm23	0.287556
Timm50	-0.0710458
Timm8a1	0.808136
Timm9	0.546205
Tinagl1	0.0553086
Tjp2	-1.04159
Tkt	0.217678
Tm9sf2	0.00182227
Tm9sf3	-0.106763
Tmco1	-0.0591154
Tmed10	-0.120053
Tmed2	0.189251
Tmed5	-0.0542693
Tmed7	-0.110295
Tmed9	-0.0158518
Tmem106b	0.493726
Tmem11	-0.140415
Tmem115	-0.488595
Tmem143	-0.907222
Tmem14c	-0.108159
Tmem161a	-0.449587
Tmem165	0.454311
Tmem168	-0.26611
Tmem173	-0.0309881
Tmem2	-0.251882
Tmem201	-0.00968478
Tmem214	0.00458204
Tmem30a	-0.772456
Tmem43	0.219975
Tmem87a	-0.295529
Tmf1	-0.500277
Tmod3	-0.417765
Tmtc3	-0.295424
Tmx2	0.232146
Tmx3	0.423593
Tmx4	0.0544397
Tnpo1	-0.778281
Tnrc18	0.731475
Tomm20	-0.0486864
Tomm22	0.446229
Tomm40	0.519563
Top2a	0.456039
Top2b	0.193405
Tor1a	-0.0580166
Tor1aip1	-0.152141
Tor1aip2	-0.630041
Tor1b	-0.050384
Tor2a	0.290349
Tox4	0.0851459
Tpcn1	0.170021
Tpi1	0.0384158
Tpm1	-0.825439
Tpm2	-0.689631
Tpm3	-0.256616
Tpm4	-0.490371
Tpr	-0.267605
Tprn	-0.370491
Tpt1	-0.0882824
Tpx2	-0.211063
Tra2a	0.203577
Tra2b	0.145377
Trabd	0.76515
Trap1	0.179706
Triap1	0.848773
Trim28	-0.0140914
Trnt1	-0.0922599
Trrap	0.168955
Try5	0.0932185
Tsfm	-0.042185
Tst	0.100627
Tuba1a	0.0796927
Tuba1b	0.505632
Tuba4a	-0.440966
Tubb5	0.594514
Tubb6	0.185325
Tufm	-0.0282141
Txn2	0.351951
Txndc12	-0.646558
Txndc5	-0.385511
Txnl1	-0.386328
U2af1	0.168467
U2af2	0.0568559
Ube2c	-0.473387
Ube2g2	0.110775
Ube2l3	0.326369
Ube4a	0.230008
Ubtf	0.00269875
Ubxn4	0.279009
Ufsp2	0.289967
Uggt1	-0.0263255
Uhrf1	0.585034
Upf1	0.358123
Uqcr10	0.0383302
Uqcrb	-0.1098
Uqcrc1	0.163369
Uqcrc2	0.554814
Uqcrfs1	-0.0404213
Uqcrh	0.239832
Uqcrq	-0.806313
Urb1	-0.0451121
Urb2	0.0508919
Usp12	-0.563342
Usp39	0.631117
Utp14a	-0.142899
Utp15	-0.0292137
Utp18	0.0944902
Utp20	0.64909
Utp3	0.0538624
Utp6	-0.0418121
Utrn	-0.190593
Vamp7	0.0320318
Vamp8	0.249786
Vapa	0.192649
Vapb	0.14564
Vars	-0.0562857
Vars2	-0.49017
Vat1	-0.431502
Vbp1	0.777225
Vcl	-0.00654323
Vcp	0.197341
Vdac1	-0.12004
Vdac2	0.254577
Vdac3	0.728977
Vim	0.27752
Vkorc1	0.377879
Vkorc1l1	-0.253916
Vps13a	-0.485301
Vps29	0.822318
Vps4a	-0.786334
Vrk2	-0.45872
Wbp11	0.102094
Wdr12	0.018276
Wdr18	-0.268883
Wdr3	0.56818
Wdr33	-0.188581
Wdr36	0.421058
Wdr43	0.0846797
Wdr61	0.0865538
Wdr75	-0.0760829
Wdr82	0.562254
Wfdc2	-0.22788
Wrnip1	0.213264
Wtap	-0.654003
Wwp2	0.0622212
Xab2	0.0536224
Xpnpep3	0.10317
Xrn2	0.203687
Yap1	-0.160632
Yars2	0.0156876
Yipf5	-0.403201
Ylpm1	-0.260163
Yme1l1	0.365101
Ythdc1	0.847471
Ythdf2	-0.359645
Ywhab	-0.132486
Ywhae	-0.176026
Ywhag	0.0949752
Ywhah	-0.0903109
Ywhaq	-0.783575
Ywhaz	-0.15847
Zadh2	-0.447334
Zc3h11a	0.157594
Zc3h13	-0.389025
Zc3h14	-1.03034
Zc3h18	-0.233451
Zc3h4	0.412891
Zc3hc1	0.135758
Zcchc8	-0.0833941
Zfr	0.209714
Zmpste24	0.799427
